# Supplementary material
Source: PubMed Central journal article supplement (PMC3442596)
Supplement: supp_tpc.111.094946_tpc094946Supplemental.pdf [file supp_tpc.111.094946_tpc094946Supplemental.pdf]

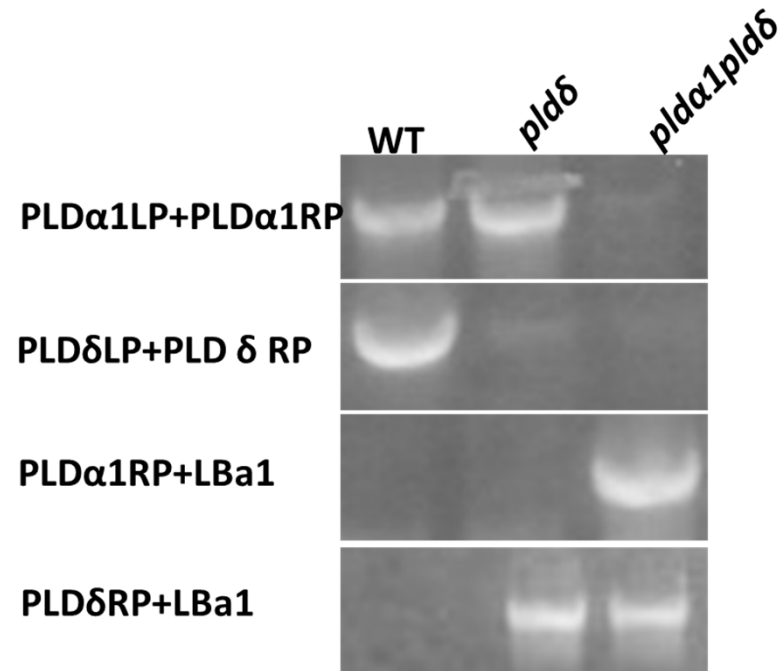

**Supplemental Figure 1.** Confirmation of homozygous T-DNA insertion PLD mutants by PCR. PCR was conducted using genomic DNA extracted from plant leaves with a pair of gene specific primers (PLDα1RP+PLDα1LP for *PLDα1* and PLDδRP+PLDδLP for *PLDδ*) or a combination of a T-DNA left border primer (LBa1) and gene specific primers (PLDα1RP and PLDδRP). The presence of a T-DNA band and lack of a *PLDα1* or *PLDδ* band indicate that *pldδ* and *pldα1pldδ* are homozygous T-DNA mutants. The primers used for PCR are listed in Table S1.

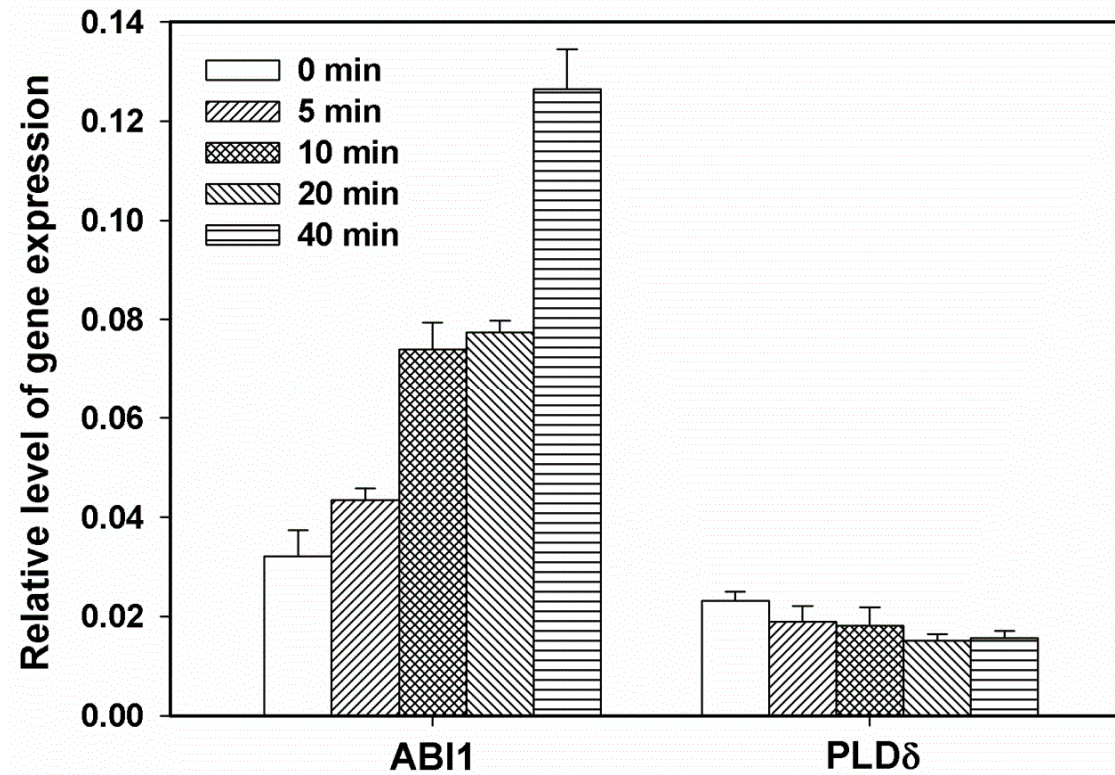

**Supplemental Figure 2.** Expression level of *PLDδ* in response to ABA.

RNA was extracted from leaves sprayed with 100  $\mu$ M ABA with 0.01% Triton X-100. *PLDδ* transcript level was measured by real-time PCR normalized to *UBQ10*. The ABA response gene *ABI1* was used as a positive control. The experiment was repeated three times with similar results. Values are means  $\pm$  SE (n = 3) for one representative experiment. The primers for real-time PCR are listed in Table S1.

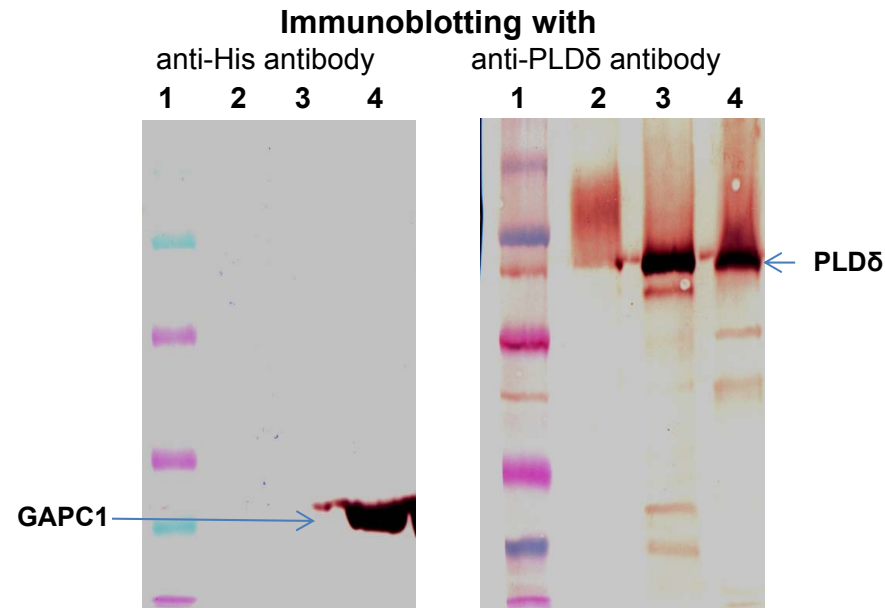

- Lane 1, Protein Kd standards
- Lane 2, Nickel-bead pulldown of *Arabidopsis* microsomal proteins without His-GAPC
- Lane 3, Total leaf microsomal extracts
- Lane 4, Nickel-bead-pulldown from microsomal proteins with added His-GAPC

**Supplemental Figure 3.** PLD $\delta$ -GAPC association as identified by GAPC1 co-precipitation of PLD $\delta$  from microsomal proteins of *Arabidopsis* leaves. Immunoblotting using anti-PLD $\delta$  (*Right*) or anti-His-tag (*Left*) antibodies of GAPC1-copulldown from *Arabidopsis* leaf microsomal extracts. *Arabidopsis* GAPC1 was fused with a His-tag, purified from *E. coli*, and incubated with leaf microsomal proteins. Microsomal fraction was isolated and dissolved in buffer A containing 0.5% Triton X-100, following a procedure described previously (Wang and Wang, 2001). Precipitates with nickel-sepharose beads were washed five times in PBS containing 0.5% Triton X-100, subjected to 10% SDS-PAGE, immunoblotted with anti-His (*Left*) or anti-PLD (*Right*) antibodies, and visualized using alkaline phosphatase staining.

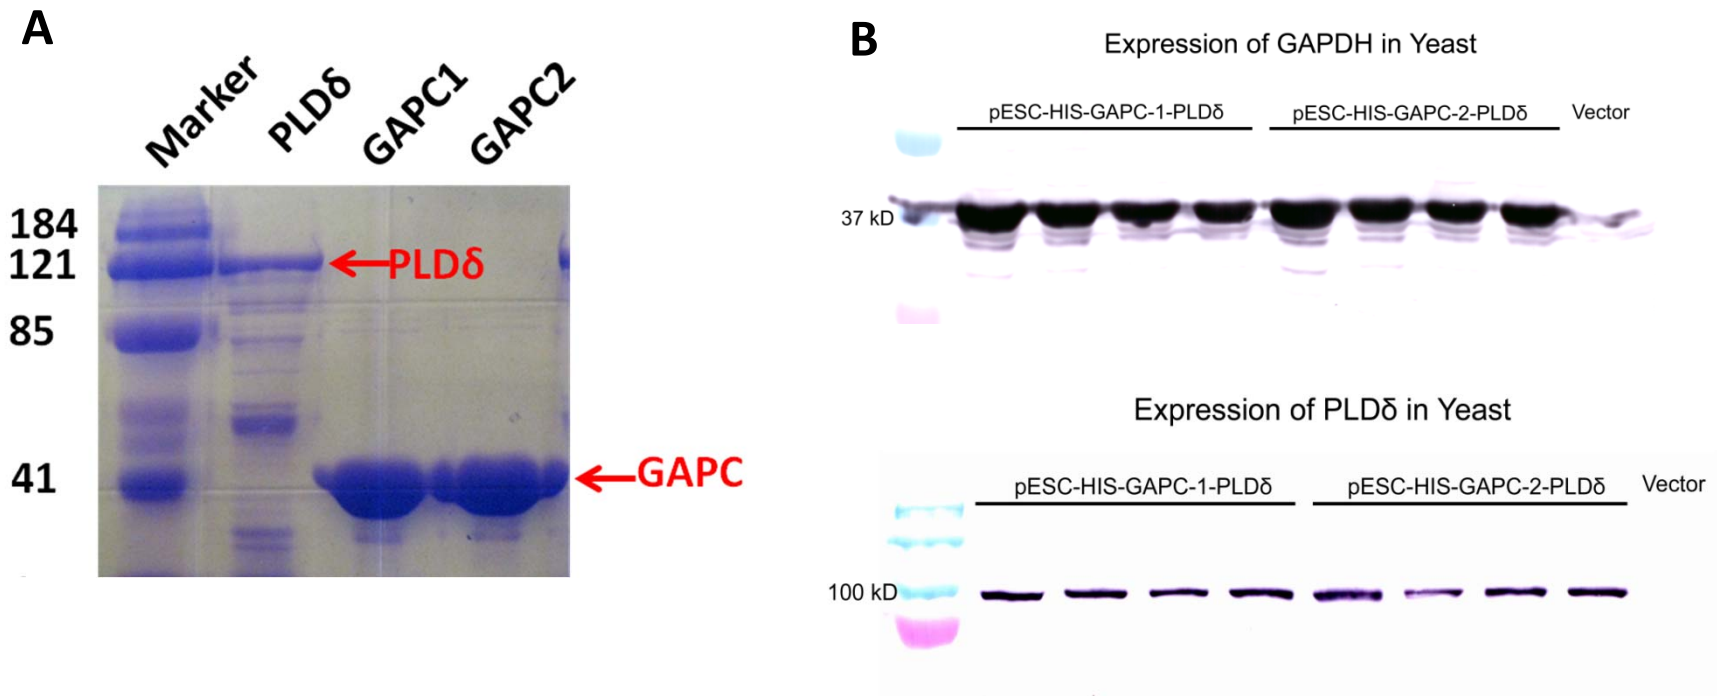

**Supplemental Figure 4.** Purification and immunoblotting of PLD $\delta$  and GAPCs produced in *E. coli* and yeast.

**(A)** Coomassie blue staining of purified PLD $\delta$  and GAPCs. PLD $\delta$  was expressed in *E. coli* as a GST fusion. GAPC1 and GAPC2 were fused with His tag and expressed in *E. coli*. PLD $\delta$  was purified using GST beads and GAPCs were purified using Ni-NTA agarose. Proteins were separated on a 10% SDS-PAGE gel followed by Coomassie blue staining.

**(B)** Immunoblotting of PLD $\delta$  and GAPCs expressed in yeast. PLD $\delta$  was co-expressed with GAPC1 or GAPC2 in yeast. Total protein (10  $\mu$ g) extracted from yeast was loaded on a 10% SDS-PAGE gel. PLD $\delta$  was immunoblotted with anti-FLAG antibody conjugated with alkaline phosphatase. GAPC1 and GAPC2 were immunoblotted with anti-cMyc antibody conjugated with alkaline phosphatase.

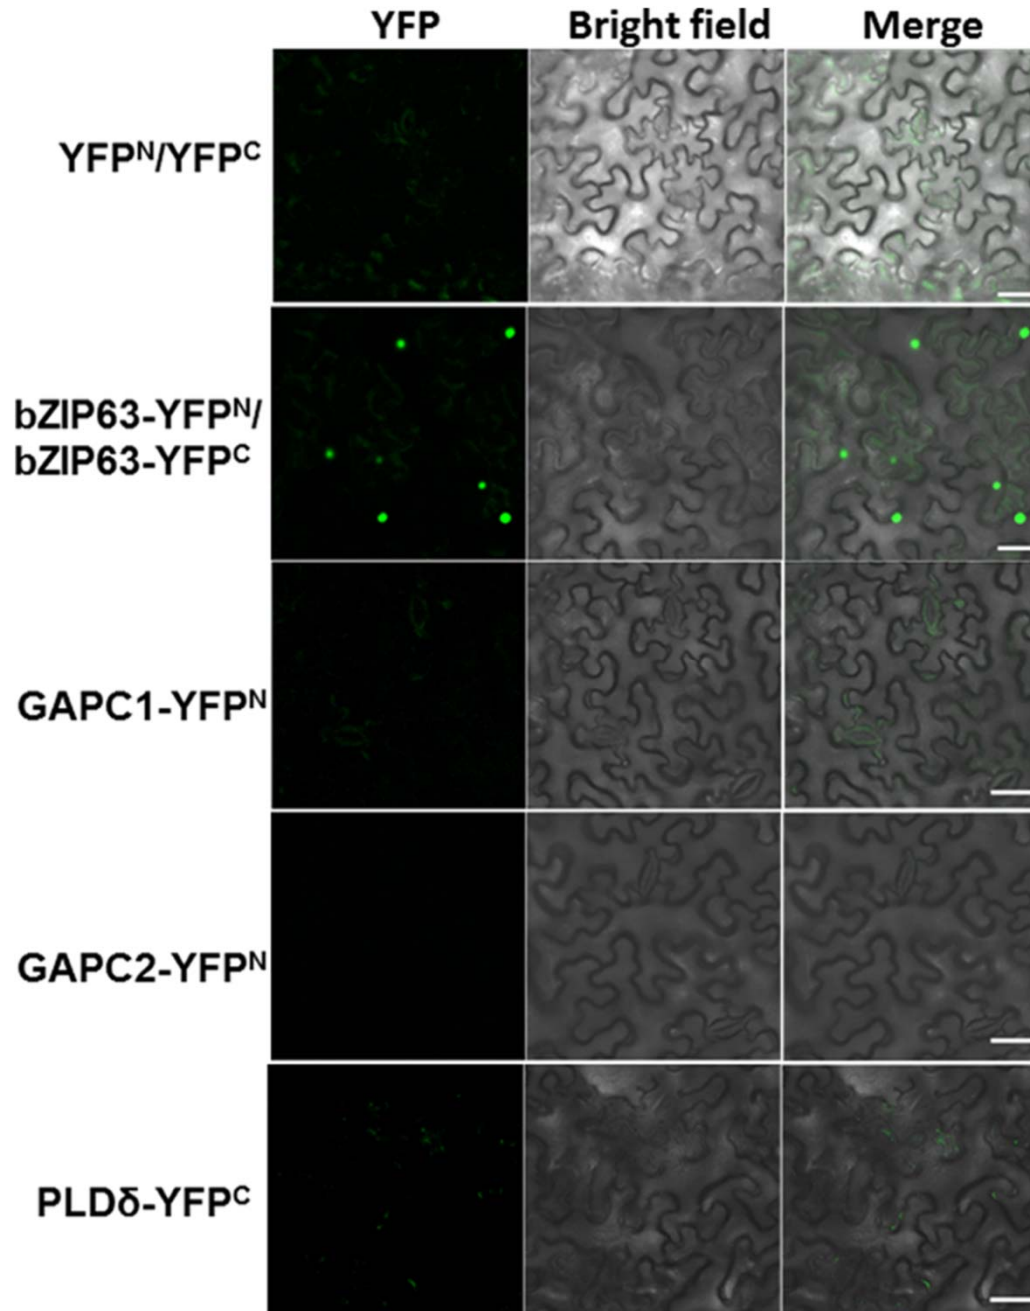

**Supplemental Figure 5.** Negative and positive control for BiFC.

Empty vectors (YFP<sup>N</sup>/YFP<sup>C</sup>) were used as negative control and did not show YFP fluorescence. The positive control bZIP63-YFP<sup>N</sup> was co-expressed with bZIP63-YFP<sup>C</sup>. Green color (spot) in the lower panel represents YFP fluorescence, indicating formation of dimers of bZIP63 in the nucleus of plant cells. The constructs were co-transformed into tobacco leaves by infiltration. GAPC-YFP<sup>N</sup> and PLDδ-YFP<sup>C</sup> were transformed separately and did not generate YFP fluorescence on their own. Photographs were taken with a Zeiss LSM 510 confocal microscope. Scale bar = 50 μm.

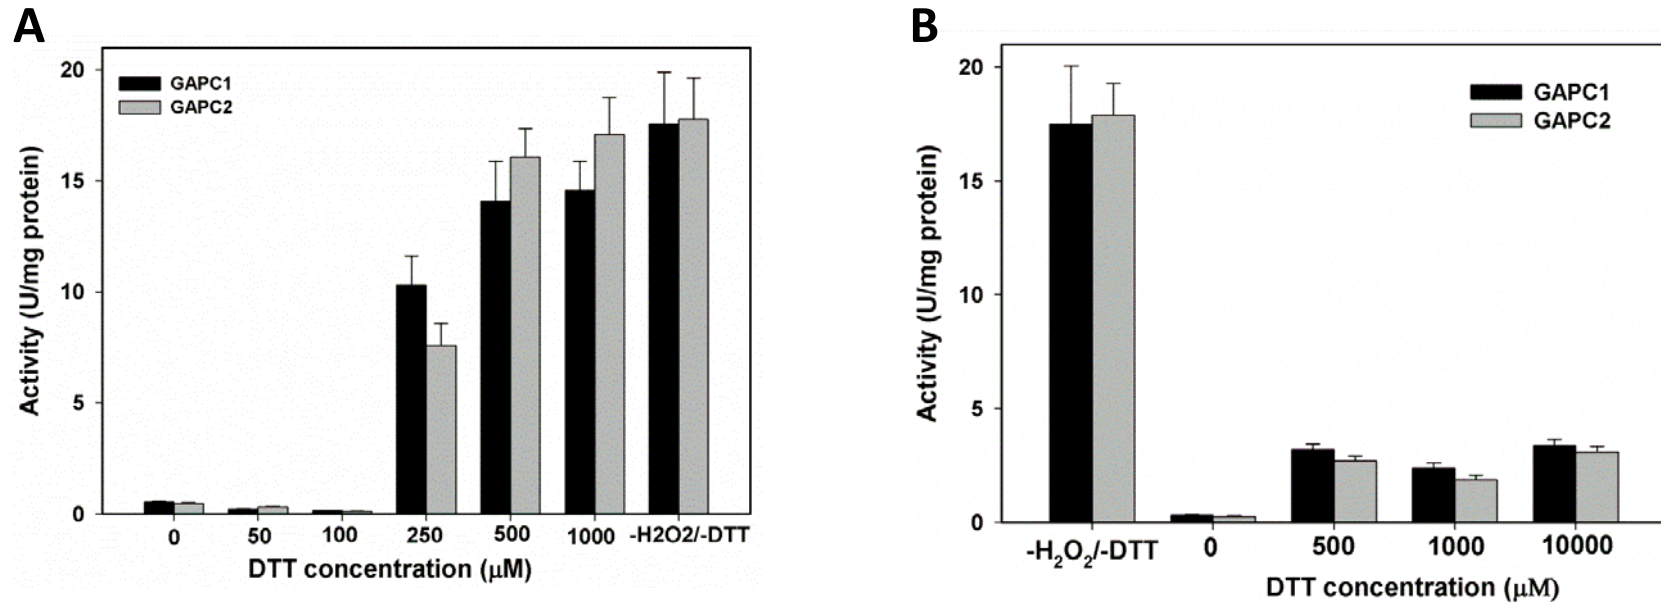

**Supplemental Figure 6.** DTT protection of GAPC activity.

**(A)** GAPC activity in the presence of increasing concentrations of DTT followed by addition of 50  $\mu\text{M}$  H<sub>2</sub>O<sub>2</sub>.

**(B)** DTT recovery of GAPC activity after H<sub>2</sub>O<sub>2</sub> treatment for 10 min. Values are means  $\pm$  SE (n = 3).

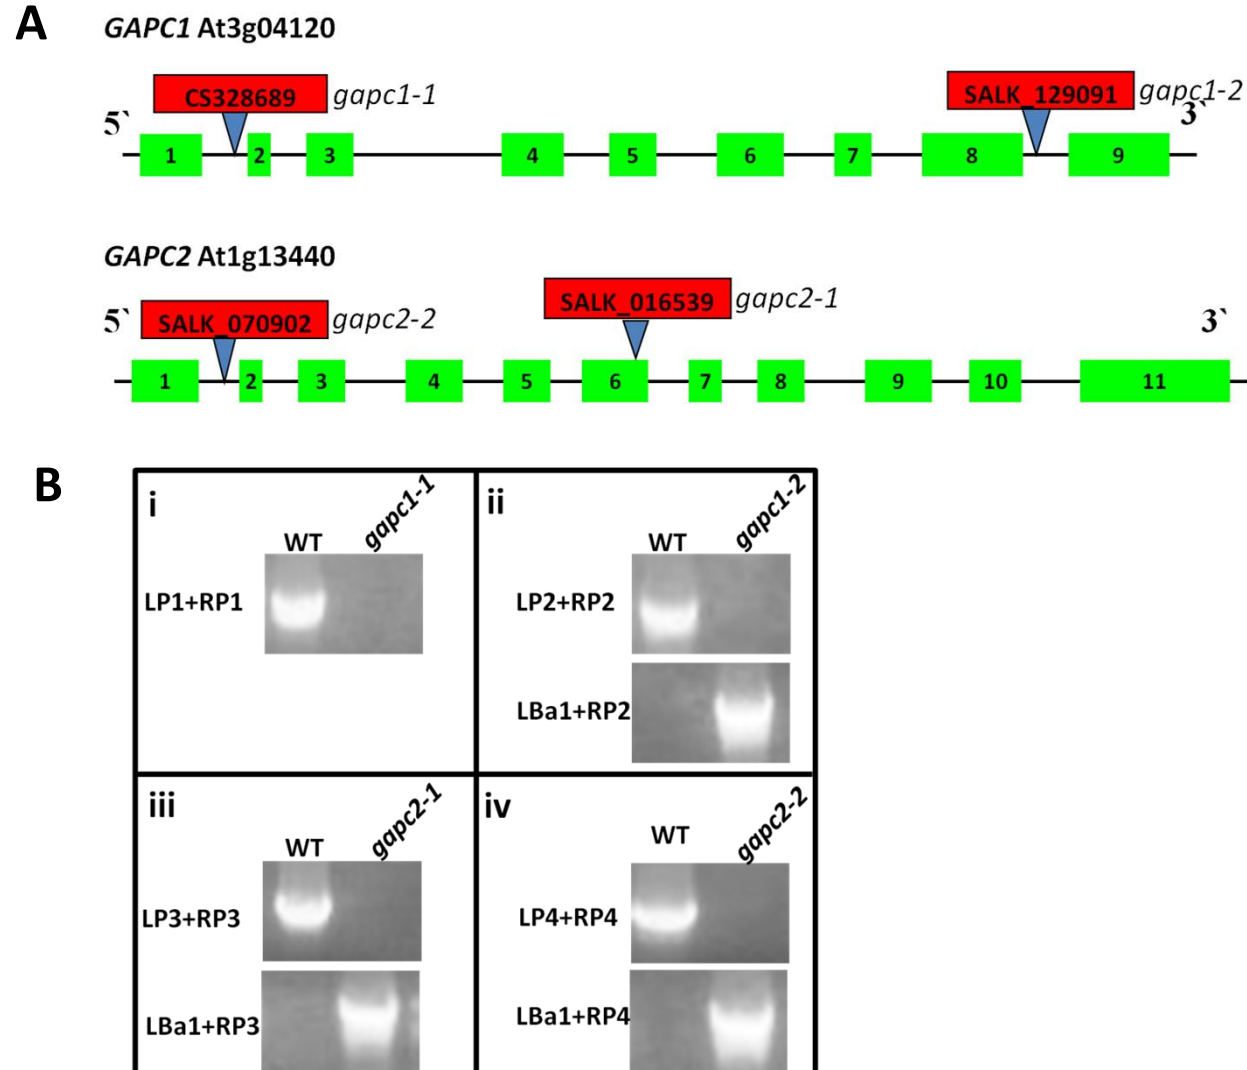

**Supplemental Figure 7.** Isolation of *GAPC* T-DNA homozygous lines.

**(A)** Gene structure with the sites of T-DNA insertion. Two individual T-DNA insertion lines were isolated for *GAPC1* and *GAPC2*, respectively.

**(B)** PCR genotyping of mutants. All four lines were homozygous mutants as shown by the absence of gene-specific bands in mutants (LP+RP). PCR was done with genomic DNA and the primers are listed in Table S1. 7

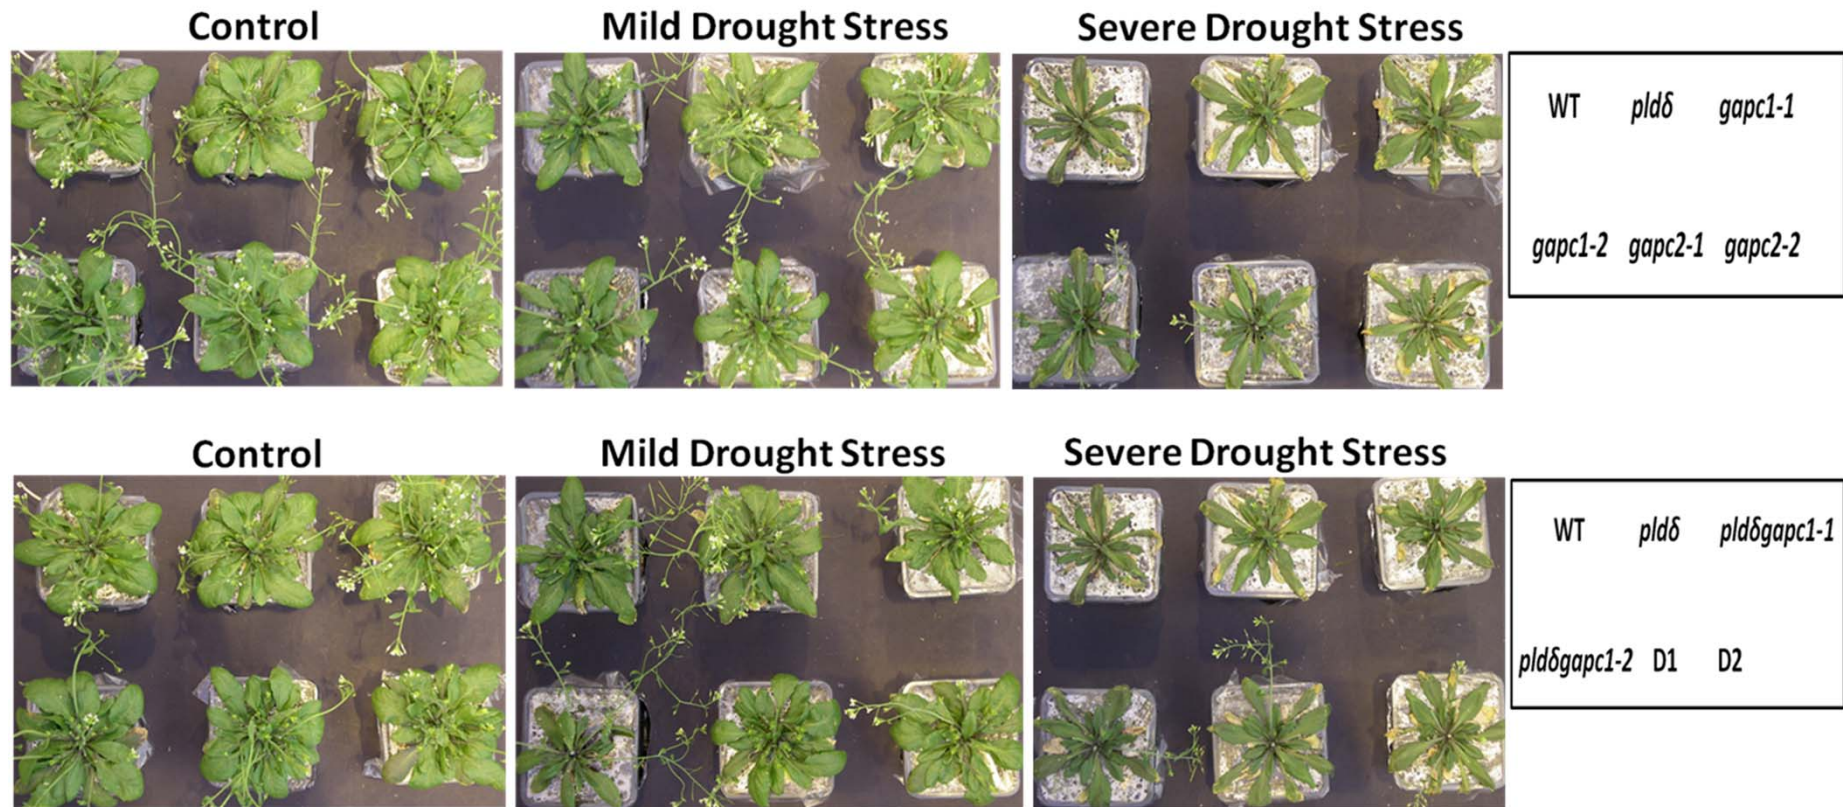

**Supplemental Figure 8.** Growth phenotype of WT and GAPC and PLD $\delta$  mutants under control and drought conditions. Photos were taken at the end of experiment when plants were 6-week old. Three experiments were performed with similar results. D1 represents *gapc1-1gapc2-1* and D2 represents *gapc1-1gapc2-2*.



**Supplemental Table: Primer list**

| Purpose                                                       | Gene                           | Primer Sequence                                                                                 |
|---------------------------------------------------------------|--------------------------------|-------------------------------------------------------------------------------------------------|
| T-DNA confirmation                                            | T-DNA                          | Lba1: 5'-TGGTTCACGTAGTGGGCCATCG-3'                                                              |
| <i>plda1</i> screening                                        | <i>PLD<math>\alpha</math>1</i> | PLD $\alpha$ 1RP: 5'-CAAGGCTGCAAAGTTTCTCTG-3'<br>PLD $\alpha$ 1LP: 5'-ATTAAGTGCAGGGCATTGATG-3'  |
| <i>pld<math>\delta</math></i> screening                       | <i>PLD<math>\delta</math></i>  | PLD $\delta$ RP: 5'-TCCGTTTGACCAGATCCATAG-3'<br>PLD $\delta$ LP: 5'-TTGCGATTATTACCAACAGCC-3'    |
| <i>gapc1-1</i> screening                                      | <i>GAPC1</i>                   | RP1: 5'-CTGATGCCGAAAACAGTGACT-3'<br>LP1: 5'-CTAGATCATTCCGACCCCTC-3'                             |
| <i>gapc1-2</i> screening                                      | <i>GAPC1</i>                   | RP2: 5'-CGAAAACGACAAATTCAGACC-3'<br>LP2: 5'-GAAGGTTGTTATCTCTGCCCC-3'                            |
| <i>gapc2-1</i> screening                                      | <i>GAPC2</i>                   | RP3: 5'-AGTGTTACGGTCAGTGGAAG-3'<br>LP3: 5'-GGTTAGGACTGAGGGTCCTTG-3'                             |
| <i>gapc2-2</i> screening                                      | <i>GAPC2</i>                   | RP4: 5'-TGTCTGCAACAAATCGATACC-3'<br>LP4: 5'-AATGGTTGGAGTAATGTTGCT G-3'                          |
| <i>GAPC1</i> cloning/<br>expression in <i>E.coli</i>          | <i>GAPC1</i>                   | Forward: 5'-GCGGGATCCATGGCTGACAAGAAGA-3'<br>Reverse: 5'-GCGAAGCTTTTAGGCCTTTGACATGT-3'           |
| <i>GAPC2</i> cloning/<br>expression in <i>E.coli</i>          | <i>GAPC2</i>                   | Forward: 5'-GCGGGATCCATGGCTGACAAGAAGATCAGA-3'<br>Reverse: 5'-GCGAAGCTTTTAGGCCTTTGACATGTGAA-3'   |
| <i>GAPC1</i> cloning/<br>expression in yeast                  | <i>GAPC1</i>                   | Forward: 5'-GCGGATCCGATGGCTGACAAGAAGATTAGG-3'<br>Reverse: 5'-GCGGGCCCTTGGCCTTTGACATGTGGACGAT-3' |
| <i>GAPC2</i> cloning/<br>expression in yeast                  | <i>GAPC2</i>                   | Forward: 5'-GCGGATCCGATGGCTGACAAGAAGATCAGA-3'<br>Reverse: 5'-GCGGGCCCTTGGCCTTTGACATGTGAACG-3'   |
| <i>PLD<math>\delta</math></i> cloning/<br>expression in yeast | <i>PLD<math>\delta</math></i>  | Forward: 5'-GCCCGGGTATGGCGGAGAAAGTATCGGA-3'<br>Reverse: 5'-GCGTCGACTTACGTGGTTAAAGTGTGCAAG-3'    |
| <i>GAPC1</i> BiFC                                             | <i>GAPC1</i>                   | Forward: 5'-GCG TCTAGAATGGCTGACAAGAAG AT-3'<br>Reverse: 5'-CGC GGTACCGGCCTTTGACATGTG GA-3'      |
| <i>GAPC2</i> BiFC                                             | <i>GAPC2</i>                   | Forward: 5'-GCGTCTAGAATGGCTGACAAGAAGATCAGA-3'<br>Reverse: 5'-CGCGGTACCGGCCTTTGACATGTGAACG-3'    |
| <i>PLD<math>\delta</math></i> BiFC                            | <i>PLD<math>\delta</math></i>  | Forward: 5'-GCGGGCGCGCCATGGCGGAGAAAGT-3'<br>Reverse: 5'-CGCCCCGGGCGTGGTTAAAGTGTCA-3'            |
| <i>pld<math>\delta</math></i> Complementation                 | <i>PLD<math>\delta</math></i>  | Forward: 5'-TGGATGGATTTATGGATCAGT-3'<br>Reverse: 5'-GGGTGCAAAATGTAGAGATCG-3'                    |
| RT-PCR                                                        | <i>GAPC1</i>                   | GAPC1-3'UTR: 5'-GAPCCCTATCATTCGAGATCTGCTTC-3'                                                   |
| RT-PCR                                                        | <i>GAPC2</i>                   | GAPC2-3'UTR: 5'-TCAACCACACACAACTCTCG-3'                                                         |
| RT-PCR                                                        | <i>18S</i><br><i>rRNA</i>      | Forward: 5'-TGGTCTTAATTGGCCGGGTC-3'<br>Reverse: 5'-CTAAGAACGGCCATGCACCAC-3'                     |
| Realtime PCR                                                  | <i>PLD<math>\delta</math></i>  | Forward: 5'-TGGGCGCATACCAACCTAATCA-3'<br>Reverse: 5'-TGGCTCCACAACTCATCTCCA-3'                   |
| Realtime PCR                                                  | <i>ABI1</i>                    | Forward: 5'-TGTGGTGGTGGTTGATTTGAAGCC-3'<br>Reverse: 5'-GCCTCAGTTCAAGGGTTTGCTCTT-3'              |
| Realtime PCR                                                  | <i>UBQ10</i>                   | Forward: 5'-CACACTCCAATTGGTCTTGCGT-3'<br>Reverse: 5'-TGGTCTTCCGGTGAGACTCTTCA-3'                 |
